# Supplementary material
Source: Springer Nature journal article supplement (https://www.springermedizin.de/resource/supplementary/13069_2011_62_MOESM4_ESM.pdf/9659702)

A

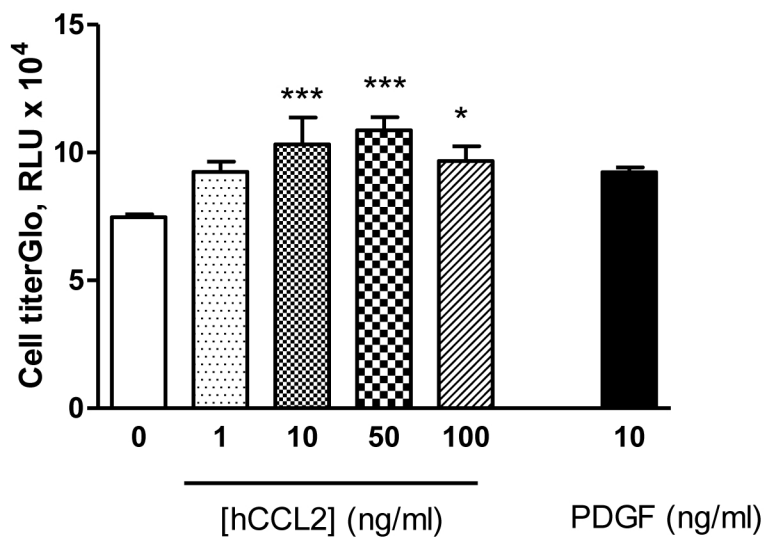

B

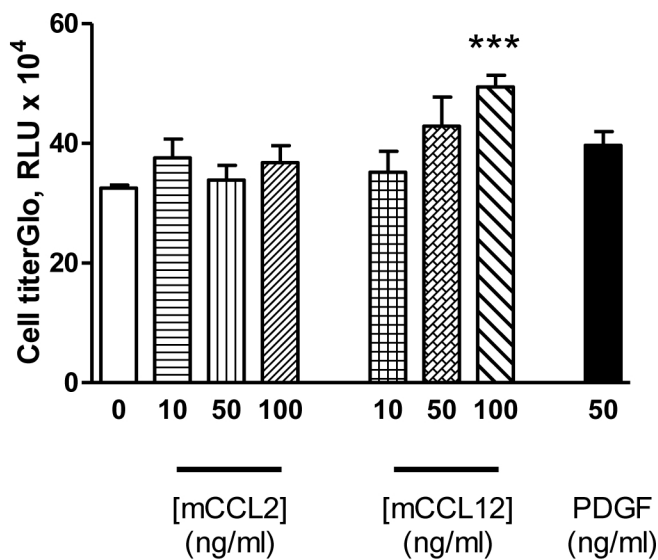

Supplement: MOESM4 [file 9659702]
